# Supplementary material for: Apparently improved energy barrier of Dy(iii) SMMs by adopting the bridging bipyrimidine ligand
Source: Royal Society of Chemistry journal article supplement (doi:10.1039/d4ce00436a), 2024-01-01
Supplement: d4ce00436a1.pdf [file d4ce00436a1.pdf]

## Supplementary Information

### Apparently improved energy barrier of Dy(III) SMMs by adopting the bridging bipyrimidine ligand

Peng Hu,<sup>b</sup> Man-Man Ding,<sup>d</sup> Xinpeng Gao,<sup>b</sup> Aixin Zhu,<sup>a</sup> Feng-Ping Xiao,<sup>\*a</sup> Jiangfei Cao<sup>\*c</sup> and Yi-Quan Zhang<sup>\*d</sup>

<sup>a</sup>*College of Chemistry and Chemical Engineering, Yunnan Normal University, Kunming 650500, P. R. China. Email: [FengpingXiao@ynnu.edu.cn](mailto:FengpingXiao@ynnu.edu.cn)*

<sup>b</sup>*School of Energy and Environment Science, Yunnan Normal University, Kunming, Yunnan 650500, P. R. China.*

<sup>c</sup>*School of Environment and Chemical Engineering, Zhaoqing University, Zhaoqing 526061, P. R. China. E-mail: 594247917@qq.com*

<sup>d</sup>*Jiangsu Key Lab for NSLSCS, School of Physical Science and Technology, Nanjing Normal University, Nanjing 210023, China. E-mail: zhangyiquan@njnu.edu.cn*

## Experimental Section

**Materials and General Characterization.** The used ligands (i.e., 4,4'-dimethyl-2,2'-bipyridyl and 2,2'-bipyrimidine) were obtained from J&K Chemical.  $\text{Ln}^{\text{III}}(\text{tfa})_3 \cdot 2\text{H}_2\text{O}$  and  $[\text{Ln}^{\text{III}}(\text{tfpa})_3]_2 \cdot \text{H}_2\text{O}$  were prepared based on reported methods.<sup>44-45</sup> X-ray diffraction (XRD) analyses were conducted using a Bruker D8 FOCUS diffractometer. Infrared spectroscopy and elemental analysis were conducted on a PerkinElmer EA 2400 II and a Thermo Scientific Nicolet iS5 instrument, respectively. Magnetic property measurements of prepared complexes were carried out on Quantum Design SQUID VSM magnetometer.

**Synthesis of  $\text{Ln}^{\text{III}}(\text{tfa})_3(\text{dmpy})$  ( $\text{Ln} = \text{Gd}$  **1**,  $\text{Dy}$  **2**).** A solution of 0.1 mmol  $\text{Ln}(\text{tfa})_3 \cdot 2\text{H}_2\text{O}$  was initially dispersed uniformly in 25 mL of heptane and refluxed for 1 hour, resulting in solution A. Subsequently, a solution of 0.1 mmol dmpy in 5 mL of  $\text{CH}_2\text{Cl}_2$  was added to A and stirred vigorously for 3 minutes. Three days later, transparent block-shaped single crystals of  $\text{Gd}^{\text{III}}(\text{tfa})_3(\text{dmpy})$  and  $\text{Dy}^{\text{III}}(\text{tfa})_3(\text{dmpy})$  were obtained through a solvent evaporation process.

For **1**, the Elemental Analytical results of  $\text{C}_{27}\text{H}_{24}\text{F}_9\text{GdN}_2\text{O}_6$  (yield: 57% base on Gd) are C 40.81; H 3.17; N 3.59(%) with calculated results of C 40.50; H 3.02; N 3.50(%). IR analysis result: 1677 (s), 1598 (m), 1527 (s), 1400(s), 1188 (s), 1163(m), 1141 (s), 1009 (m), 927 (m), 795 (w), 584(w)  $\text{cm}^{-1}$ .

For **2**, the Elemental Analytical results of  $\text{C}_{27}\text{H}_{24}\text{F}_9\text{DyN}_2\text{O}_6$  (yield: 54%) are C 40.40; H 3.17; N 3.53 (%) with calculated results of C 40.24; H 3.03; N 3.48. IR analysis result: 1679 (s), 1597 (m), 1527 (s), 1400(s), 1189 (s), 1163(m), 1141 (s), 1010 (m), 927 (m), 795 (w), 582(w)  $\text{cm}^{-1}$ .

**Synthesis of  $\text{Ln}^{\text{III}}(\text{tfpa})_3(\text{dmpy})$  ( $\text{Ln} = \text{Gd}$  **3**,  $\text{Dy}$  **4**).** The synthetic methods of  $\text{Ln}(\text{tfa})_3(\text{dmpy})$  are similar to  $\text{Ln}(\text{tfa})_3(\text{dmpy})$ .

For **3**, the Elemental Analytical results for  $\text{C}_{27}\text{H}_{24}\text{F}_9\text{GdN}_2\text{O}_6$  (yield: 57% base on Gd) are C 40.81; H 3.17; N 3.59(%) with calculated results of C 40.50; H 3.02; N 3.50. (%) IR analysis result: 1628 (s), 1591 (m), 1502 (m), 1451 (m), 1404(s), 1361 (m), 1184 (s), 1139 (s), 1059 (m), 1003 (m), 942 (m), 801 (m), 732 (m), 601 (m)  $\text{cm}^{-1}$ .

For **4**, the Elemental Analytical results for  $\text{C}_{27}\text{H}_{24}\text{F}_9\text{DyN}_2\text{O}_6$  (yield: 54%) are C 40.40; H 3.17; N 3.53. (%) with calculated results of C 40.24; H 3.03; N 3.48 (%). IR analysis result: 1628 (s), 1592 (m), 1502 (m), 1451 (m), 1404(s), 1361 (m), 1184 (s), 1139 (s), 1059 (m), 1002 (m), 942 (m), 801 (m), 733 (w), 603 (w)  $\text{cm}^{-1}$ .

**Synthesis of  $[\text{Ln}^{\text{III}}(\text{tfa})_3]_2(\text{bpyd})$  ( $\text{Ln} = \text{Gd}$  **5**,  $\text{Dy}$  **6**).** A dispersion of  $\text{Ln}(\text{tfa})_3 \cdot 2\text{H}_2\text{O}$  (0.1 mmol) in 25 mL of heptane was heated until boiling. Following a 1-hour reflux, a solution containing 0.05 mmol of bpyd in 10 mL of  $\text{CHCl}_3$  was introduced. The mixture was stirred for an additional 5 minutes and then cooled to room temperature. Through a three-day solvent evaporation process, transparent block-shaped single crystals of compounds **5** and **6** were obtained.

For **5**, empirical formula is  $\text{C}_{68}\text{H}_{42}\text{F}_{18}\text{Gd}_2\text{N}_4\text{O}_{12}$  (yield: 38% base on Gd). The elemental analytical measured values are C 46.74; H 2.27; N 3.24 (%) with calculated results of C 46.31; H 2.40; N 3.18. IR analysis result: 3426(w), 1601(s), 1539(m), 1501(s), 1259(s), 1225(s), 1152(s), 811(m), 657(m), 587(w)  $\text{cm}^{-1}$ .

For **6**, empirical formula is  $C_{68}H_{42}F_{18}Dy_2N_4O_{12}$  (yield: 40% base on Dy). The elemental analytical measured values are C 46.51; H 2.30; N 3.20 (%) with calculated results of C 46.13; H 2.38; N 3.16. IR analysis result: 3428(w), 1603(s), 1539(m), 1501(s), 1259(s), 1226(s), 1150(s), 812(m), 657(m), 588(w)  $cm^{-1}$ .

**Synthesis of  $[Ln^{III}(tfpa)_3]_2(bpyd)$  (Ln = Gd **7**, Dy **8**).** The preparation procedures for  $[Ln^{III}(tfpa)_3]_2(bpyd)$  follow a similar pathway to that of  $[Ln^{III}(tfa)_3]_2(bpyd)$ . Initially,  $Ln(tfpa)_3 \cdot 2H_2O$  (0.1 mmol) was uniformly dispersed in 25 mL of heptane and heated until boiling occurred. Subsequently, the mixture was refluxed for 1 hour, following which a solution containing 0.05 mmol of bpyd in 10 mL of  $CHCl_3$  was introduced. The combined mixture was stirred vigorously for an additional 5 minutes before being cool down to room temperature. After standing for three days, transparent block-shaped single crystals of compounds **7** and **8** were obtained through a solvent evaporation method.

For **7**, the Elemental Analytical results for  $C_{27}H_{24}F_9GdN_2O_6$  (yield: 57% base on Gd ) are C 40.81; H 3.17; N 3.59 (%) with calculated results of C 40.50; H 3.02; N 3.50. (%) IR analysis result: 1601 (m), 1549 (s), 1520 (m), 1464 (s), 1401 (s), 1310(m), 1247 (s), 1191 (s), 1127 (s), 813 (m), 645(w), 575(w)  $cm^{-1}$ .

For **8**, the Elemental Analytical results for  $C_{27}H_{24}F_9DyN_2O_6$  (yield: 54% base on Dy) are C 40.40; H 3.17; N 3.53. (%) with calculated results of C 40.24; H 3.03; N 3.48. IR analysis result: 1601 (m), 1547 (s), 1520 (m), 1463 (s), 1401 (s), 1310 (m), 1248 (s), 1191 (s), 1127 (s), 812 (m), 645 (w), 577 (w)  $cm^{-1}$ .

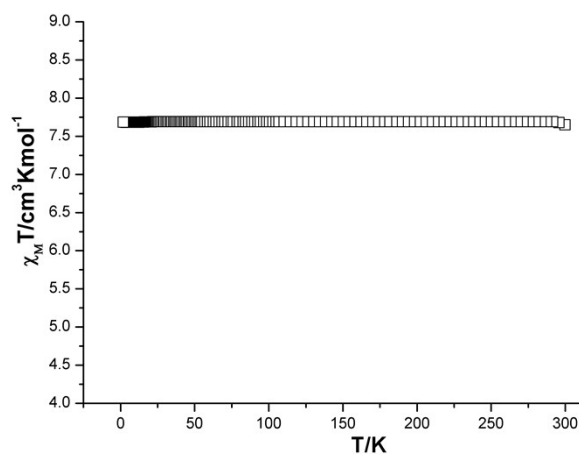

**Figure S1** Experimental temperature dependence magnetic susceptibility of complex **1**.

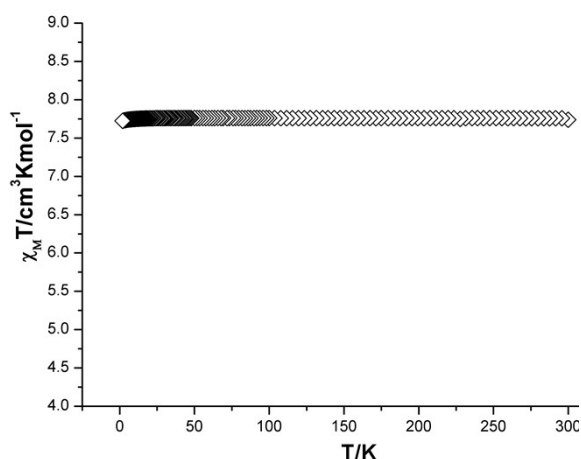

**Figure S2** Experimental temperature dependence magnetic susceptibility of complex **3**.

### Equation S1

$$\chi_M = \left( \frac{2Ng^2\beta^2}{kT} \right) \times \left( \frac{\exp(J/kT) + 5\exp(3J/kT) + 14\exp(6J/kT) + 30\exp(10J/kT) + 55\exp(15J/kT) + 91\exp(21J/kT) + 140\exp(28J/kT)}{1 + 3\exp(J/kT) + 5\exp(3J/kT) + 7\exp(6J/kT) + 9\exp(10J/kT) + 11\exp(15J/kT) + 13\exp(21J/kT) + 15\exp(28J/kT)} \right)$$

### Computational details

Both of binuclear complexes **6** and **8** with central symmetrical structure have one type of magnetic center Dy<sup>III</sup> ion. Complete-active-space self-consistent field (CASSCF) calculations on individual Dy<sup>III</sup> fragments for **6** and **8** (see Figure S3 for the calculated complete structures of **6** and **8**) on the basis of single-crystal X-ray determined geometry have been carried out with MOLCAS 8.4<sup>S1</sup> program package. Each individual Dy<sup>III</sup> fragment in **6** and **8** was calculated keeping the experimentally determined structure of the corresponding compound while replacing the neighboring Dy<sup>III</sup> ion by diamagnetic Lu<sup>III</sup>.

The basis sets for all atoms are atomic natural orbitals from the MOLCAS ANO-RCC library: ANO-RCC-VTZP for Dy<sup>III</sup>; VTZ for close N and O; VDZ for distant atoms. The calculations employed the second order Douglas-Kroll-Hess Hamiltonian, where scalar relativistic contractions were taken into account in the basis set and the spin-orbit couplings were handled separately in the restricted active space state interaction (RASSI-SO) procedure. Active electrons in 7 active spaces include all *f* electrons (CAS(9 in 7) in the CASSCF calculation. To exclude all the doubts, we calculated all the roots in the active space. We have mixed the maximum number of spin-free state which was possible with our hardware (all from 21 sextets, 128 from 224 quadruplets, 130 from 490 doublets for Dy<sup>II</sup>). SINGLE\_ANISO<sup>S2</sup> program was used to obtain the energy levels, *g* tensors, magnetic axes, *et al.*, based on the above CASSCF/RASSI-SO calculations.

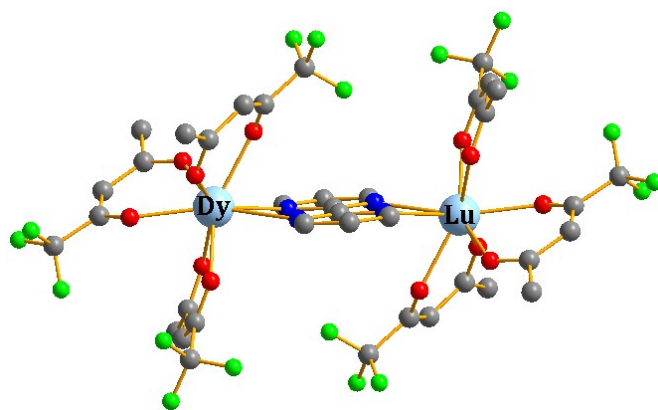

6

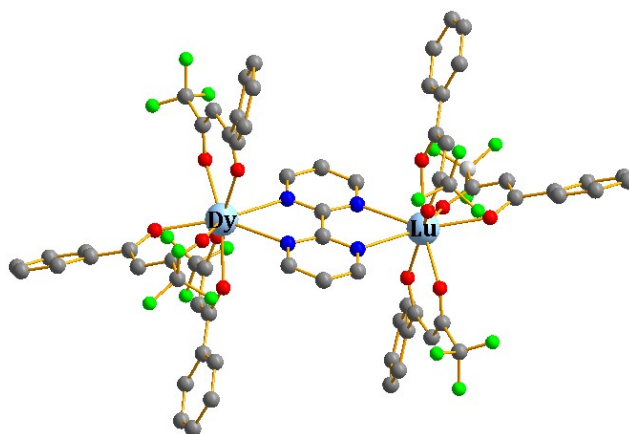

8

**Figure S3.** Calculated complete structures of complexes **6** and **8**; H atoms are omitted.

**Table S1.** Calculated energy levels ( $\text{cm}^{-1}$ ),  $\mathbf{g}$  ( $g_x, g_y, g_z$ ) tensors and predominant  $m_J$  values of the lowest eight Kramers doublets (KDs) of individual  $\text{Dy}^{\text{III}}$  fragments for complexes **6** and **8** using CASSCF/RASSI-SO with MOLCAS 8.4.

| KD<br>s | 6                  |                          |            | 8                  |                              |            |
|---------|--------------------|--------------------------|------------|--------------------|------------------------------|------------|
|         | $E/\text{cm}^{-1}$ | $\mathbf{g}$             | $m_J$      | $E/\text{cm}^{-1}$ | $\mathbf{g}$                 | $m_J$      |
| 1       | 0.0                | 0.006<br>0.012<br>19.499 | $\pm 15/2$ | 0.0                | 0.026<br>0.040<br>19.33<br>9 | $\pm 15/2$ |
| 2       | 126.8              | 0.297<br>0.446<br>16.429 | $\pm 13/2$ | 124.2              | 0.617<br>1.151<br>15.23<br>5 | $\pm 13/2$ |
| 3       | 175.5              | 1.567<br>1.804<br>13.586 | $\pm 11/2$ | 192.9              | 1.365<br>2.030<br>11.39<br>9 | $\pm 11/2$ |

|   |       |                          |           |       |                              |           |
|---|-------|--------------------------|-----------|-------|------------------------------|-----------|
| 4 | 220.5 | 4.326<br>5.393<br>7.338  | $\pm 7/2$ | 246.7 | 8.976<br>6.736<br>3.038      | $\pm 5/2$ |
| 5 | 266.6 | 2.044<br>3.355<br>11.021 | $\pm 5/2$ | 285.0 | 1.680<br>3.734<br>12.05<br>3 | $\pm 3/2$ |
| 6 | 343.6 | 0.194<br>0.288<br>16.635 | $\pm 3/2$ | 325.7 | 0.443<br>0.650<br>18.72<br>5 | $\pm 7/2$ |
| 7 | 437.9 | 0.034<br>0.081<br>16.372 | $\pm 1/2$ | 439.3 | 0.035<br>0.065<br>18.02<br>6 | $\pm 1/2$ |
| 8 | 497.9 | 0.017<br>0.068<br>18.136 | $\pm 9/2$ | 562.9 | 0.009<br>0.016<br>19.26<br>9 | $\pm 9/2$ |

**Table S2.** Wave functions with definite projection of the total moment  $|m_J\rangle$  for the lowest two KDs of individual Dy<sup>III</sup> fragments for complexes **6** and **8**.

|          | $E/\text{cm}^{-1}$ | wave functions                                                           |
|----------|--------------------|--------------------------------------------------------------------------|
| <b>6</b> | 0.0                | 94.5% $ \pm 15/2\rangle$                                                 |
|          | 126.8              | 75% $ \pm 13/2\rangle$ +10.1% $ \pm 11/2\rangle$ +7.8% $ \pm 9/2\rangle$ |
| <b>8</b> | 0.0                | 90.8% $ \pm 15/2\rangle$ +7.9% $ \pm 11/2\rangle$                        |
|          | 124.2              | 65.9% $ \pm 13/2\rangle$ +24.1% $ \pm 9/2\rangle$                        |

To fit the exchange interactions in complexes **6** and **8**, we took two steps to obtain them. Firstly, we calculated individual Dy<sup>III</sup> fragments using CASSCF/RASSI-SO to obtain the corresponding magnetic properties. Then, the exchange interactions between the magnetic centers were considered within the Lines model,<sup>S3</sup> while the account of the dipole-dipole magnetic couplings were treated exactly. The Lines model is effective and has been successfully used widely in the research field of *d* and *f*-elements single-molecule magnets.<sup>S4</sup>

For complexes **6** and **8**, there is only one type of  $\tilde{J}$ .

The Ising exchange Hamiltonian is:

$$\hat{H}_{\text{exch}} = -\tilde{J} \hat{S}_{\text{Dy}1}^z \hat{S}_{\text{Dy}2}^z \quad (1)$$

The  $\tilde{J}_{\text{total}}$  is the parameter of the total magnetic interaction ( $\tilde{J}_{\text{total}} = \tilde{J}_{\text{dip}} + \tilde{J}_{\text{exch}}$ )

between magnetic center ions. The  $\tilde{S}_{Dy} = 1/2$  is the ground pseudospin on the Dy<sup>III</sup> site. The dipolar magnetic coupling can be calculated exactly, while the exchange coupling constant was fitted through comparison of the computed and measured magnetic susceptibilities using the POLY\_ANISO program.<sup>S2</sup>

**Table S3.** Exchange energies  $E$  (cm<sup>-1</sup>), the energy difference between each exchange doublets  $\Delta_t$  (cm<sup>-1</sup>) and the main values of the  $g_z$  for the lowest two exchange doublets of **6** and **8**.

|   | <b>6</b> |                       |            | <b>8</b> |                       |            |
|---|----------|-----------------------|------------|----------|-----------------------|------------|
|   | $E$      | $\Delta_t$            | $g_z$      | $E$      | $\Delta_t$            | $g_z$      |
| 1 | 0.00     | $0.61 \times 10^{-6}$ | 0.000      | 0.00     | $0.77 \times 10^{-5}$ | 0.000      |
| 2 | 1.42     | $0.44 \times 10^{-6}$ | 38.99<br>8 | 1.39     | $0.50 \times 10^{-5}$ | 38.67<br>8 |

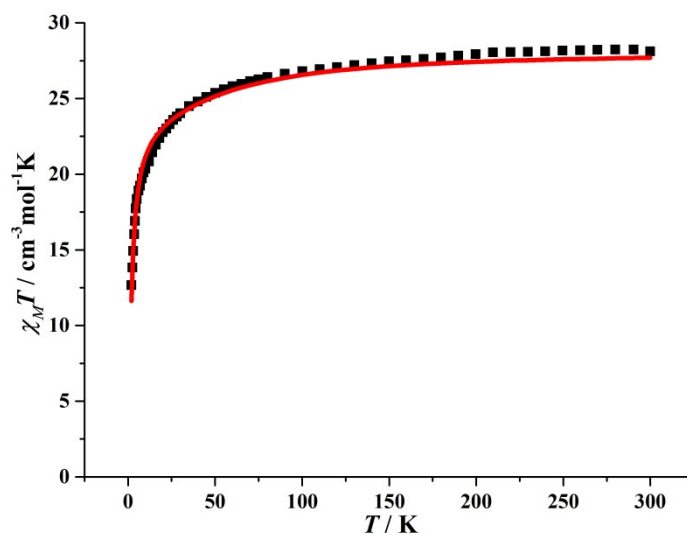

**6**

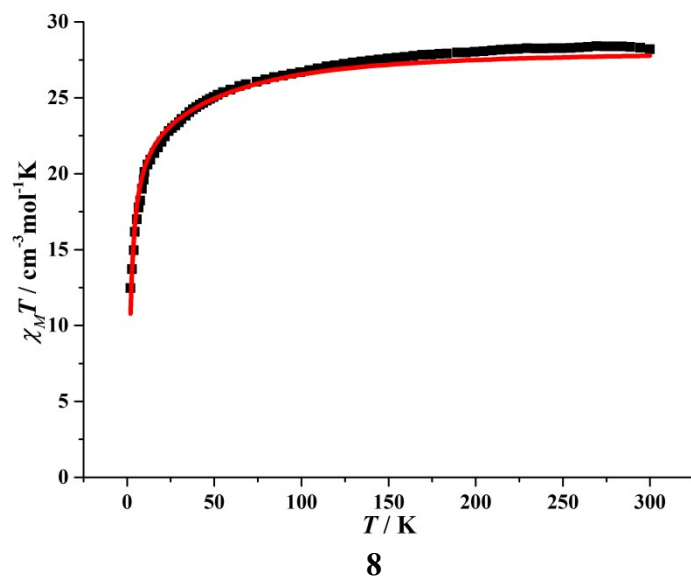

**Figure S4.** Calculated (red solid line) and experimental (black square dot) data of magnetic susceptibilities of **1** and **2**. The intermolecular interactions  $zJ'$  of **1** and **2** were fitted to  $-0.02$  and  $-0.04$   $\text{cm}^{-1}$ , respectively.

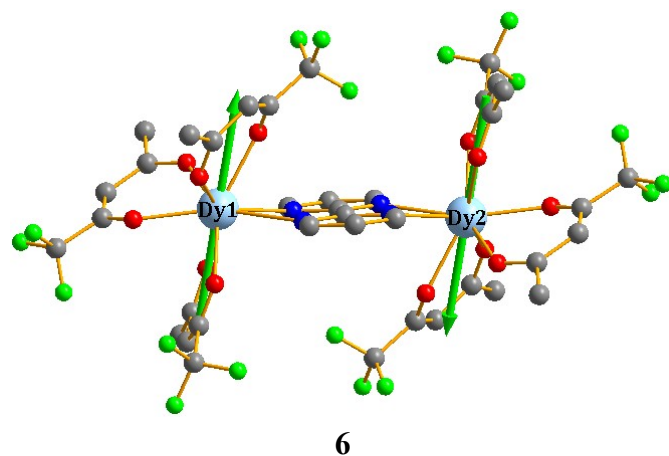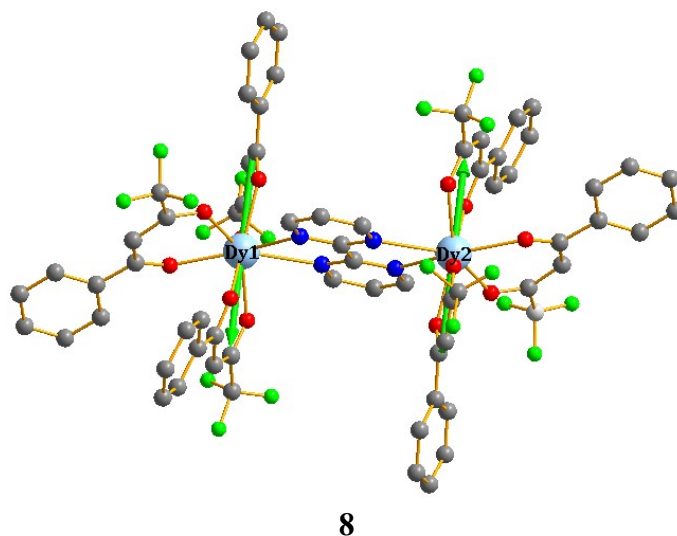

**Figure S5.** Calculated orientations of the local main magnetic axes on  $\text{Dy}^{\text{III}}$  of complexes **6** and **8**.



## References:

- S1 F. Aquilante, J. Autschbach, R. K. Carlson, L. F. Chibotaru, M. G. Delcey, L. De Vico, I. Fdez. Galván, N. Ferré, L. M. Frutos, L. Gagliardi, M. Garavelli, A. Giussani, C. E. Hoyer, G. Li Manni, H. Lischka, D. Ma, P. Å. Malmqvist, T. Müller, A. Nenov, M. Olivucci, T. B. Pedersen, D. Peng, F. Plasser, B. Pritchard, M. Reiher, I. Rivalta, I. Schapiro, J. Segarra-Martí, M. Stenrup, D. G. Truhlar, L. Ungur, A. Valentini, S. Vancoillie, V. Veryazov, V. P. Vysotskiy, O. Weingart, F. Zapata, R. Lindh, MOLCAS 8: New Capabilities for Multiconfigurational Quantum Chemical Calculations across the Periodic Table, *J. Comput. Chem.*, 2016, **37**, 506.
- S2 (a) Chibotaru, L. F.; Ungur, L.; Soncini, A. *Angew. Chem. Int. Ed.*, 2008, **47**, 4126. (b) Ungur, L.; Van den Heuvel, W.; Chibotaru, L. F. *New J. Chem.*, 2009, **33**, 1224. (c) Chibotaru, L. F.; Ungur, L.; Aronica, C.; Elmoll, H.; Pilet, G.; Luneau, D. *J. Am. Chem. Soc.*, 2008, **130**, 12445.
- S3 Lines, M. E. *J. Chem. Phys.* **1971**, *55*, 2977.
- S4 (a) Mondal, K. C.; Sundt, A.; Lan, Y. H.; Kostakis, G. E.; Waldmann, O.; Ungur, L.; Chibotaru, L. F.; Anson, C. E.; Powell, A. K. *Angew. Chem. Int. Ed.* 2012, **51**, 7550. (b) Langley, S. K.; Wielechowski, D. P.; Vieru, V.; Chilton, N. F.; Moubaraki, B.; Abrahams, B. F.; Chibotaru, L. F.; Murray, K. S. *Angew. Chem. Int. Ed.* 2013, **52**, 12014.
